# Supplementary material
Source: Springer Nature journal article supplement (https://www.springermedizin.de/resource/supplementary/12887_2014_1064_MOESM2_ESM.pdf/9476408)

■ Commercial baby food

▨ Non commercial baby food

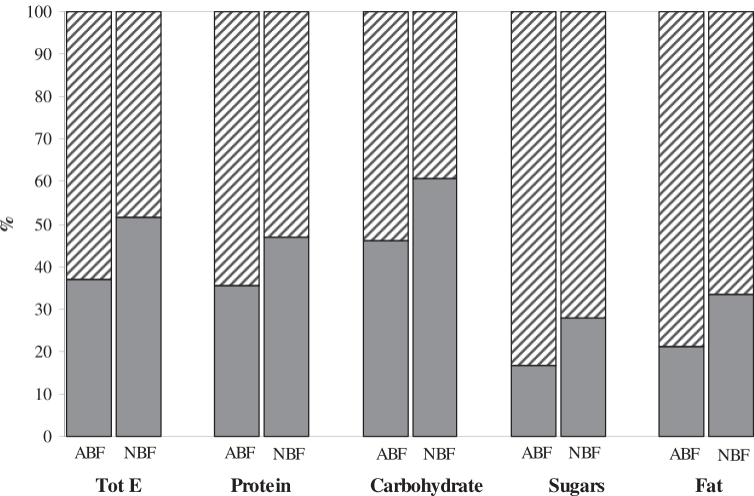

Supplement: MOESM2 [file 9476408]
